# Supplementary material for: Hydrophilic interaction chromatography coupled matrix assisted laser desorption/ionization mass spectrometry for molecular analysis of organic compounds in medicines, tea, and coffee
Source: Royal Society of Chemistry journal article supplement (doi:10.1039/c3an01425h), 2013-01-01
Supplement: c3an01425h.doc [file c3an01425h.doc]

**Hydrophilic interaction chromatography coupled matrix assisted laser desorption/ionization mass spectrometry for molecular analysis of organic compounds in medicine, tea, and coffee**

Ren-Qi Wang1,*, Kai Bao2, Jean-Philippes Croué3 and Siu Choon Ng4,**

*1, College of Chemistry and Chemical Engineering, Lanzhou University, Lanzhou 730000, China*

*2, Division of Mathematics and Computer Science and Engineering, King Abdullah University of Science and Technology, Thuwal 23955-6900, Saudi Arabia*

*3, Water Desalination & Reuse Center (WDRC), 4700 King Abdullah University of Science and Technology, Kingdom of Saudi Arabia*

*4, School of Chemical and Biomolecular Engineering, Nanyang Technological University, 62 Nanyang Drive, Singapore 637459, Singapore*

HILIC-MALDI-MS spectra of active ingredients in Panadol, Compound Pseudoephedrine Hydrochloride Sustained Release Tablet (PHSR), Coffee, and Tea are illustrated as follows:


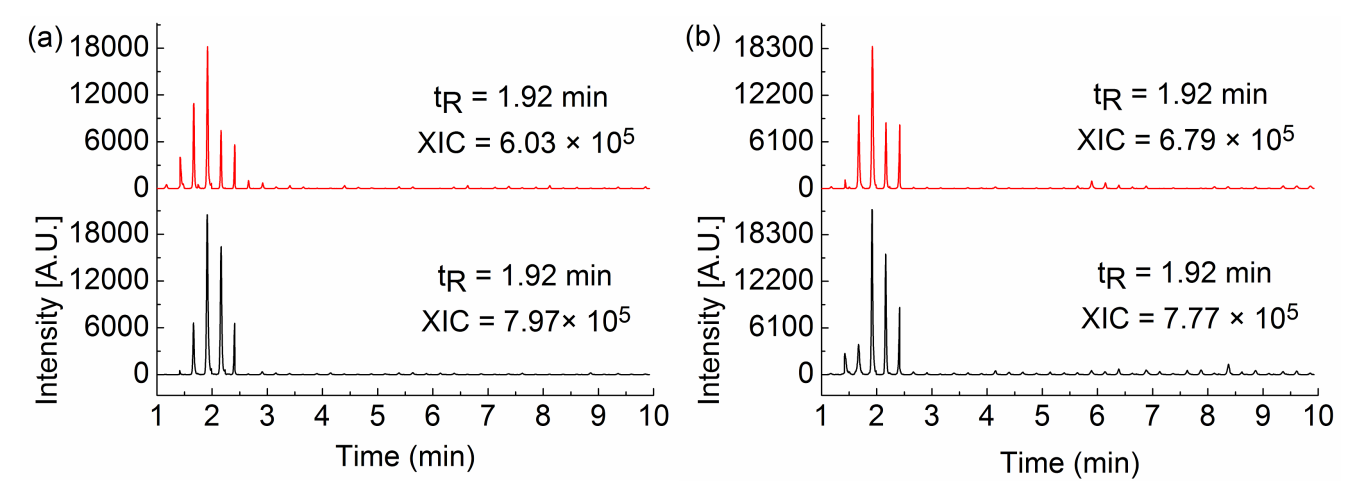


Figure SD1. Paracetamol in Panadol (a) and PHSR (b). Red spectra were collected in basic HILIC condition; black spectra were collected in acid condition.


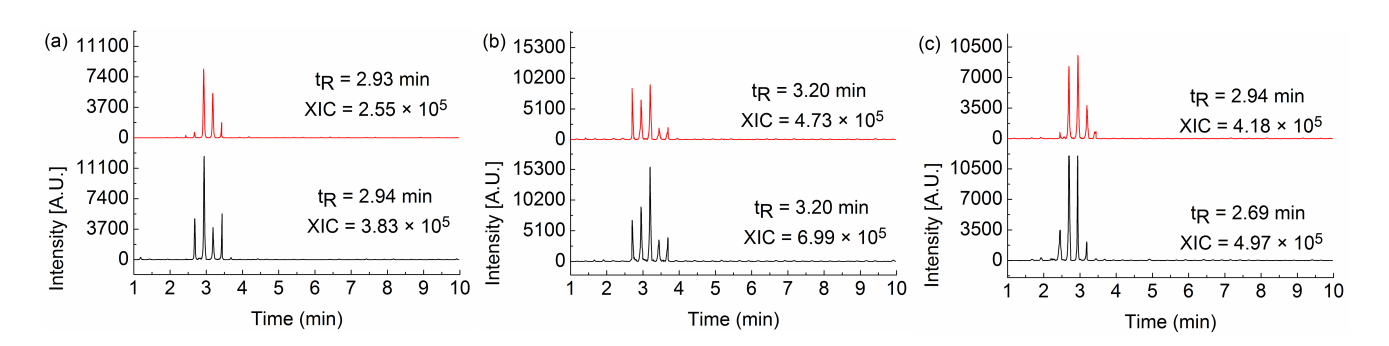


Figure SD2. Caffeine in Panadol (a) Coffee (b), and Tea (c). Red spectra were collected in basic HILIC condition; black spectra were collected in acid condition.


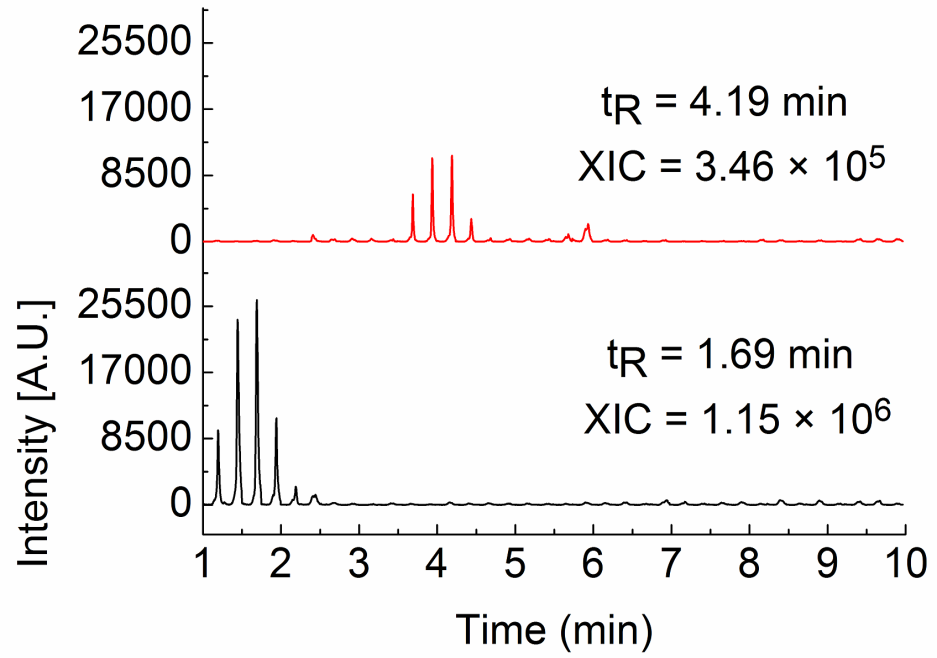


Figure SD3. Pseudoephedrine in PHSR. Red spectra were collected in basic HILIC condition; black spectra were collected in acid condition.

Typical HILIC/ESI-MS spectra of Pseudoephedrine in PHSR are illustrated as follows:


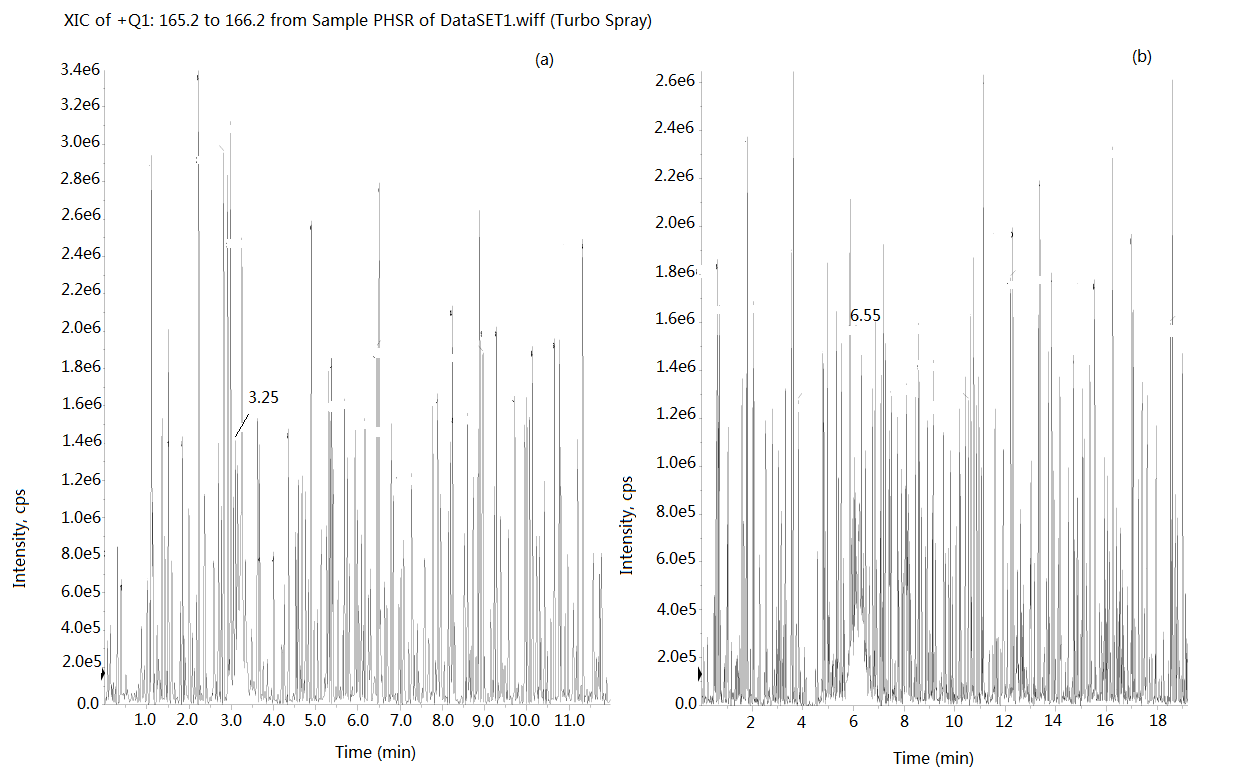


Figure SD4. Pseudoephedrine in PHSR. XIC spectra collected in HILIC/ESI-MS; (a) acid condition (b) basic condition.
